# Supplementary material for: Structural properties of Kudzu protein enzymatic hydrolysate and its repair effect on HepG2 cells damaged by H2O2 oxidation
Source: Royal Society of Chemistry journal article supplement (doi:10.1039/d3fo02988c), 2023-01-01
Supplement: d3fo02988c1.pdf [file d3fo02988c1.pdf]

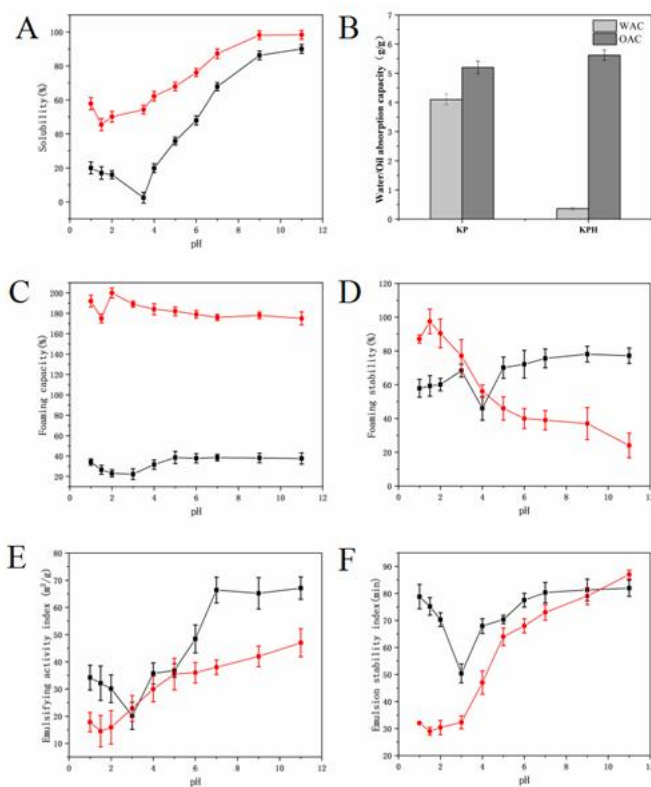

In the figure, A-B are the solubility (A), water holding capacity (WAC B), oil holding capacity (OAC B), foaming property (C), foaming stability (D), emulsifying property (E) and emulsifying stability (F) of KP (black line) and KPH (red line), respectively.
